# Supplementary material
Source: publisher figshare collection journal article supplement (https://tandf.figshare.com/ndownloader/files/33141995)
Supplement: Supplementary file 1 [file 33141995]

**Supplemental material**

*Tooth prognosis*

Good prognosis: Residual pocket depths (≤3 mm) and ≤1/3 loss of proximal bone compared with normal bone height. Uncertain prognosis: Residual pocket depths 4–6 mm, proximal bone loss 1/3–2/3 of normal bone height. Inflammation of the tissues with bleeding on probing. Furcation involvement not exceeding grade II. Poor prognosis: Residual pocket depths ≥7 mm, proximal bone loss ≥ 2/3 of normal bone height. Inflammation of the tissues with bleeding on probing. Furcation involvement at least class II if present. Horizontal mobility of up to 1 mm. Hopeless prognosis: Pocket depths ≥9 mm. Inflammation of the tissues with bleeding on probing. Horizontal mobility of ≥1 mm with apical depressability. Furcation involvement III if present.

*Oral hygiene and gingival inflammation*

Oral hygiene was assessed by the clinician at each of the maintenance visits based on the distribution and abundance of plaque. The presence or absence of bleeding was determined after running a probe along the wall of the pocket/crevice. The oral health status was determined as follows: good equated to little or no generalized plaque and no gingival inflammation. Moderate equated to the generalized presence of minor amounts of plaque (not covering more than 1/3 of the buccal/lingual surfaces from the gingival margin) with bleeding on probing, or isolated areas of abundant plaque (covering more than 1/3 of the buccal/lingual surfaces) with bleeding on probing. Poor equated to generalized abundant plaque (covering more than 1/3 of the buccal/lingual tooth surfaces) with bleeding on probing. The scores were recorded in the charts at every maintenance visit and the overall oral health status was the majority score.
